# Supplementary material for: Copper- and Silver-Containing Heterometallic Iodobismuthates: Features of Thermochromic Behavior
Source: MDPI journal article supplement (doi:10.3390/ijms24087234), 2023-04-13
Supplement: s1 [file s1]

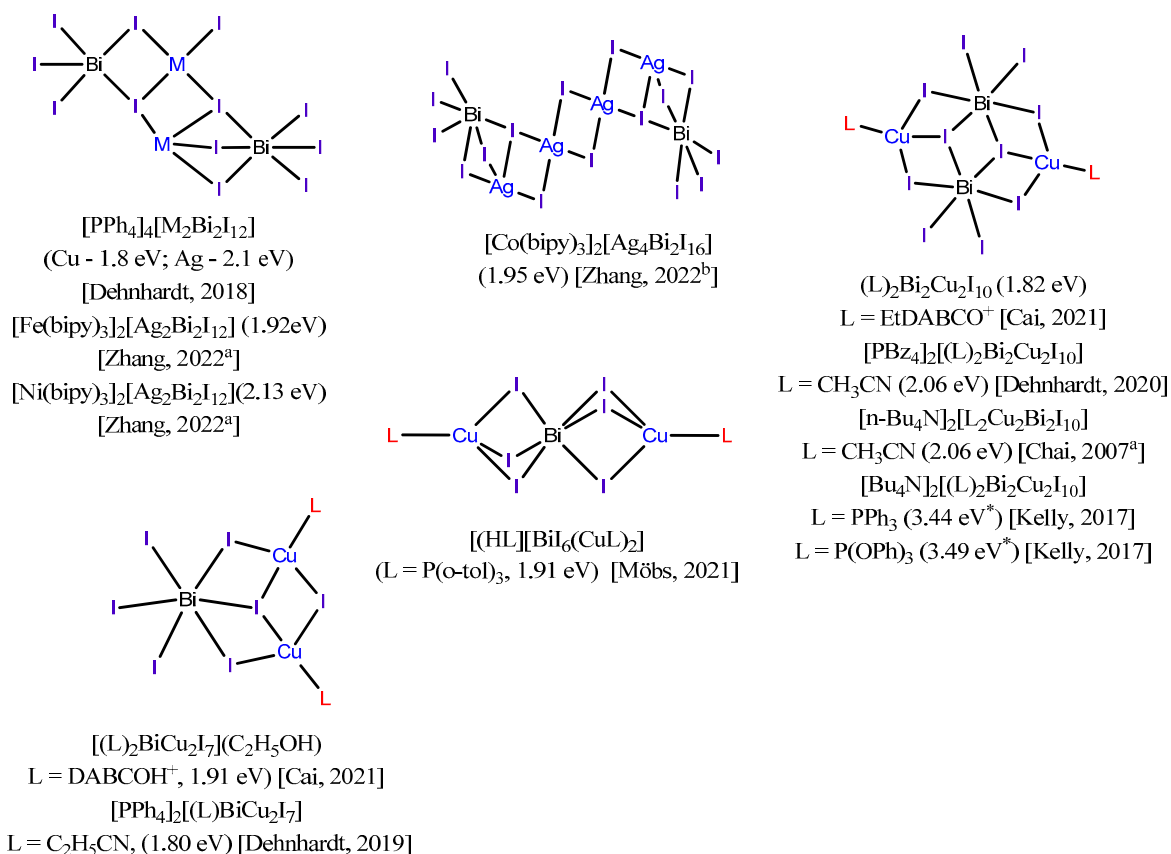

**Figure S1.** Recent progress in discrete copper and silver iodobismuthates: known structural motifs of anions and estimated band gaps for compounds provided from literature (Dehnhardt, 2018 [19]; Dehnhardt, 2020 [21]; Dehnhardt, 2023 [23]; Kelly, 2017 [24]; Chai, 2007<sup>a</sup> [25]; Cai, 2021 [31]; Möbs, 2021 [32]; Chang, 2022<sup>a</sup> [33]; Chang, 2022<sup>b</sup> [34]). In [24] band gap was determined via DFT calculations instead of optical measurements.

**Table S1.** Crystal data and structure refinement for the compounds.

| Identification code                                          | 1                                                                                              | 3                                                                                                              | 4                                                                                              | 5                                                                                              | 6                                                                                                              | 7                                                                                                              |
|--------------------------------------------------------------|------------------------------------------------------------------------------------------------|----------------------------------------------------------------------------------------------------------------|------------------------------------------------------------------------------------------------|------------------------------------------------------------------------------------------------|----------------------------------------------------------------------------------------------------------------|----------------------------------------------------------------------------------------------------------------|
| CCDC number                                                  | 2244394                                                                                        | 2244395                                                                                                        | 2244396                                                                                        | 2244397                                                                                        | 2244398                                                                                                        | 2244399                                                                                                        |
| Empirical formula                                            | C <sub>14</sub> H <sub>20</sub> Bi <sub>2</sub> Cu <sub>2</sub> I <sub>10</sub> N <sub>2</sub> | C <sub>12</sub> H <sub>14</sub> Bi <sub>2</sub> Cl <sub>2</sub> Cu <sub>2</sub> I <sub>10</sub> N <sub>2</sub> | C <sub>14</sub> H <sub>20</sub> Bi <sub>2</sub> Cu <sub>2</sub> I <sub>10</sub> N <sub>2</sub> | C <sub>14</sub> H <sub>20</sub> Ag <sub>2</sub> Bi <sub>2</sub> I <sub>10</sub> N <sub>2</sub> | C <sub>12</sub> H <sub>14</sub> Ag <sub>2</sub> Bi <sub>2</sub> Cl <sub>2</sub> I <sub>10</sub> N <sub>2</sub> | C <sub>12</sub> H <sub>14</sub> Ag <sub>2</sub> Bi <sub>2</sub> Br <sub>2</sub> I <sub>10</sub> N <sub>2</sub> |
| Formula weight                                               | 2030.36                                                                                        | 2071.19                                                                                                        | 2030.36                                                                                        | 2119.02                                                                                        | 2159.85                                                                                                        | 2248.77                                                                                                        |
| Temperature/K                                                | 150(2)                                                                                         | 150(2)                                                                                                         | 130(2)                                                                                         | 150(2)                                                                                         | 150(2)                                                                                                         | 150(2)                                                                                                         |
| Space group                                                  | <i>P</i> -1                                                                                    | <i>P</i> 2 <sub>1</sub> / <i>c</i>                                                                             | <i>P</i> -1                                                                                    | <i>P</i> 2 <sub>1</sub> / <i>n</i>                                                             | <i>P</i> 2 <sub>1</sub> / <i>n</i>                                                                             | <i>P</i> 2 <sub>1</sub> / <i>n</i>                                                                             |
| <i>a</i> /Å                                                  | 8.1532(3)                                                                                      | 8.1843(3)                                                                                                      | 8.1160(4)                                                                                      | 8.4937(3)                                                                                      | 8.4917(3)                                                                                                      | 8.5108(2)                                                                                                      |
| <i>b</i> /Å                                                  | 10.0476(3)                                                                                     | 15.5548(5)                                                                                                     | 10.1659(6)                                                                                     | 14.4970(5)                                                                                     | 14.4710(5)                                                                                                     | 14.4603(3)                                                                                                     |
| <i>c</i> /Å                                                  | 22.6474(11)                                                                                    | 14.6497(5)                                                                                                     | 11.4804(6)                                                                                     | 15.0043(5)                                                                                     | 14.8197(6)                                                                                                     | 14.9074(3)                                                                                                     |
| $\alpha$ /°                                                  | 89.936(3)                                                                                      | 90                                                                                                             | 99.852(4)                                                                                      | 90                                                                                             | 90                                                                                                             | 90                                                                                                             |
| $\beta$ /°                                                   | 87.272(3)                                                                                      | 104.0220(10)                                                                                                   | 96.634(4)                                                                                      | 95.4670(10)                                                                                    | 94.413(2)                                                                                                      | 94.9910(10)                                                                                                    |
| $\gamma$ /°                                                  | 74.289(3)                                                                                      | 90                                                                                                             | 105.844(5)                                                                                     | 90                                                                                             | 90                                                                                                             | 90                                                                                                             |
| Volume/Å <sup>3</sup>                                        | 1783.81(12)                                                                                    | 1809.41(11)                                                                                                    | 884.53(9)                                                                                      | 1839.12(11)                                                                                    | 1815.70(12)                                                                                                    | 1827.68(7)                                                                                                     |
| <i>Z</i>                                                     | 2                                                                                              | 2                                                                                                              | 1                                                                                              | 2                                                                                              | 2                                                                                                              | 2                                                                                                              |
| $\rho_{\text{calc}}$ /cm <sup>3</sup>                        | 3.780                                                                                          | 3.802                                                                                                          | 3.812                                                                                          | 3.827                                                                                          | 3.951                                                                                                          | 4.086                                                                                                          |
| $\mu$ /mm <sup>-1</sup>                                      | 19.674                                                                                         | 19.542                                                                                                         | 19.838                                                                                         | 18.991                                                                                         | 19.382                                                                                                         | 21.295                                                                                                         |
| <i>F</i> (000)                                               | 1744.0                                                                                         | 1776.0                                                                                                         | 872.0                                                                                          | 1816.0                                                                                         | 1848.0                                                                                                         | 1920.0                                                                                                         |
| Crystal size/mm <sup>3</sup>                                 | 0.15 × 0.12 × 0.10                                                                             | 0.15 × 0.08 × 0.08                                                                                             | 0.3 × 0.2 × 0.2                                                                                | 0.06 × 0.03 × 0.02                                                                             | 0.15 × 0.10 × 0.10                                                                                             | 0.10 × 0.10 × 0.08                                                                                             |
| Radiation                                                    | MoK $\alpha$ ( $\lambda$ = 0.71073)                                                            | MoK $\alpha$ ( $\lambda$ = 0.71073)                                                                            | MoK $\alpha$ ( $\lambda$ = 0.71073)                                                            | MoK $\alpha$ ( $\lambda$ = 0.71073)                                                            | MoK $\alpha$ ( $\lambda$ = 0.71073)                                                                            | MoK $\alpha$ ( $\lambda$ = 0.71073)                                                                            |
| 2 $\Theta$ range for data collection/°                       | 4.212 to 58.122                                                                                | 3.882 to 66.278                                                                                                | 6.788 to 50.052                                                                                | 3.916 to 63.032                                                                                | 5.358 to 72.784                                                                                                | 3.932 to 72.948                                                                                                |
| Index ranges                                                 | -11 ≤ <i>h</i> ≤ 11, -13 ≤ <i>k</i> ≤ 13, -3 ≤ <i>l</i> ≤ 30                                   | -12 ≤ <i>h</i> ≤ 12, -23 ≤ <i>k</i> ≤ 18, -16 ≤ <i>l</i> ≤ 22                                                  | -9 ≤ <i>h</i> ≤ 8, -9 ≤ <i>k</i> ≤ 12, -13 ≤ <i>l</i> ≤ 12                                     | -12 ≤ <i>h</i> ≤ 12, -21 ≤ <i>k</i> ≤ 21, -22 ≤ <i>l</i> ≤ 22                                  | -13 ≤ <i>h</i> ≤ 14, -23 ≤ <i>k</i> ≤ 24, -24 ≤ <i>l</i> ≤ 23                                                  | -14 ≤ <i>h</i> ≤ 14, -23 ≤ <i>k</i> ≤ 24, -19 ≤ <i>l</i> ≤ 24                                                  |
| Reflections collected                                        | 7868                                                                                           | 23933                                                                                                          | 5614                                                                                           | 35281                                                                                          | 36035                                                                                                          | 29761                                                                                                          |
| Independent reflections                                      | 7868 [ <i>R</i> <sub>int</sub> = 0.0343, <i>R</i> <sub>sigma</sub> = 0.0620]                   | 6867 [ <i>R</i> <sub>int</sub> = 0.0601, <i>R</i> <sub>sigma</sub> = 0.0494]                                   | 3124 [ <i>R</i> <sub>int</sub> = 0.0484, <i>R</i> <sub>sigma</sub> = 0.0791]                   | 6128 [ <i>R</i> <sub>int</sub> = 0.0435, <i>R</i> <sub>sigma</sub> = 0.0303]                   | 8798 [ <i>R</i> <sub>int</sub> = 0.0326, <i>R</i> <sub>sigma</sub> = 0.0281]                                   | 8877 [ <i>R</i> <sub>int</sub> = 0.0314, <i>R</i> <sub>sigma</sub> = 0.0316]                                   |
| Data/restraints/parameters                                   | 7868/108/276                                                                                   | 6867/0/138                                                                                                     | 3124/0/138                                                                                     | 6128/0/138                                                                                     | 8798/0/138                                                                                                     | 8877/6/148                                                                                                     |
| Goodness-of-fit on <i>F</i> <sup>2</sup>                     | 1.154                                                                                          | 1.145                                                                                                          | 1.035                                                                                          | 1.061                                                                                          | 1.081                                                                                                          | 1.034                                                                                                          |
| Final <i>R</i> indexes [ <i>I</i> ≥ 2 $\sigma$ ( <i>I</i> )] | <i>R</i> <sub>1</sub> = 0.0570, <i>wR</i> <sub>2</sub> = 0.1238                                | <i>R</i> <sub>1</sub> = 0.0260, <i>wR</i> <sub>2</sub> = 0.0660                                                | <i>R</i> <sub>1</sub> = 0.0521, <i>wR</i> <sub>2</sub> = 0.1098                                | <i>R</i> <sub>1</sub> = 0.0234, <i>wR</i> <sub>2</sub> = 0.0440                                | <i>R</i> <sub>1</sub> = 0.0233, <i>wR</i> <sub>2</sub> = 0.0439                                                | <i>R</i> <sub>1</sub> = 0.0251, <i>wR</i> <sub>2</sub> = 0.0430                                                |
| Final <i>R</i> indexes [all data]                            | <i>R</i> <sub>1</sub> = 0.0671, <i>wR</i> <sub>2</sub> = 0.1297                                | <i>R</i> <sub>1</sub> = 0.0290, <i>wR</i> <sub>2</sub> = 0.0672                                                | <i>R</i> <sub>1</sub> = 0.0614, <i>wR</i> <sub>2</sub> = 0.1177                                | <i>R</i> <sub>1</sub> = 0.0294, <i>wR</i> <sub>2</sub> = 0.0470                                | <i>R</i> <sub>1</sub> = 0.0269, <i>wR</i> <sub>2</sub> = 0.0449                                                | <i>R</i> <sub>1</sub> = 0.0316, <i>wR</i> <sub>2</sub> = 0.0445                                                |
| Largest diff. peak/hole / e Å <sup>-3</sup>                  | 6.69/-1.98                                                                                     | 1.62/-1.15                                                                                                     | 4.24/-5.57                                                                                     | 1.18/-2.02                                                                                     | 2.00/-2.27                                                                                                     | 2.16/-1.72                                                                                                     |

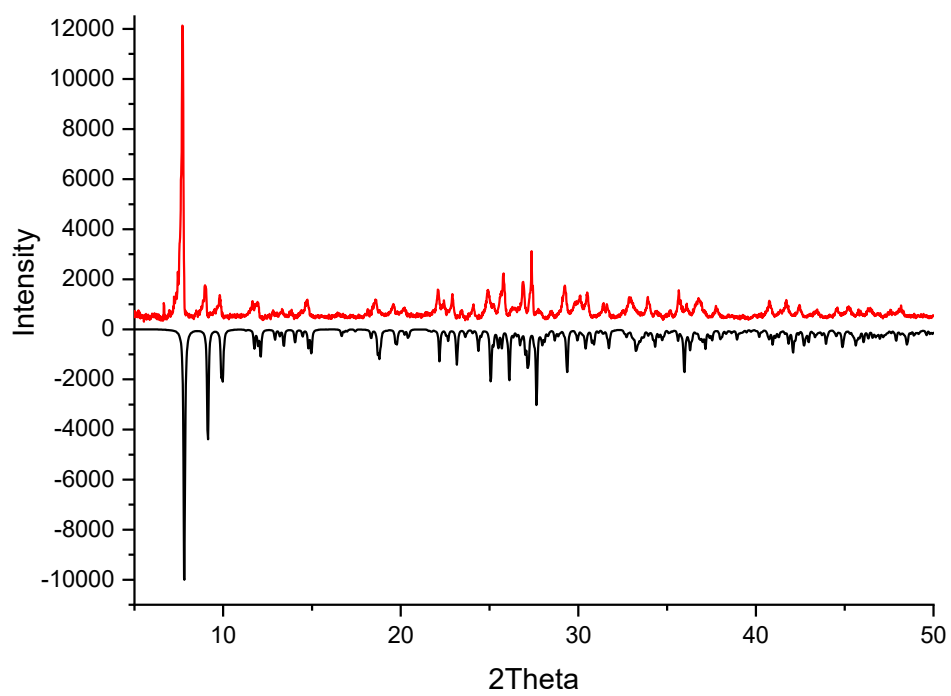

**Figure S2.** Powder XRD for the pure phase of **1** (*red*) shown in comparison with the pattern simulated from single crystal x-ray data for this compound (*black*).

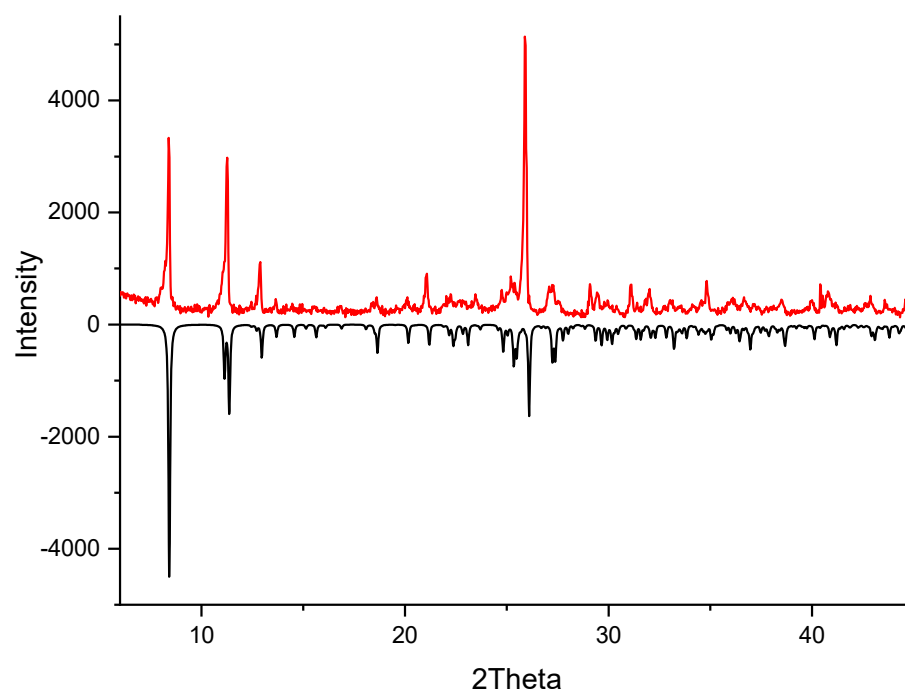

**Figure S3.** Powder XRD for the pure phase of **3** (*red*) shown in comparison with the pattern simulated from single crystal x-ray data for this compound (*black*).

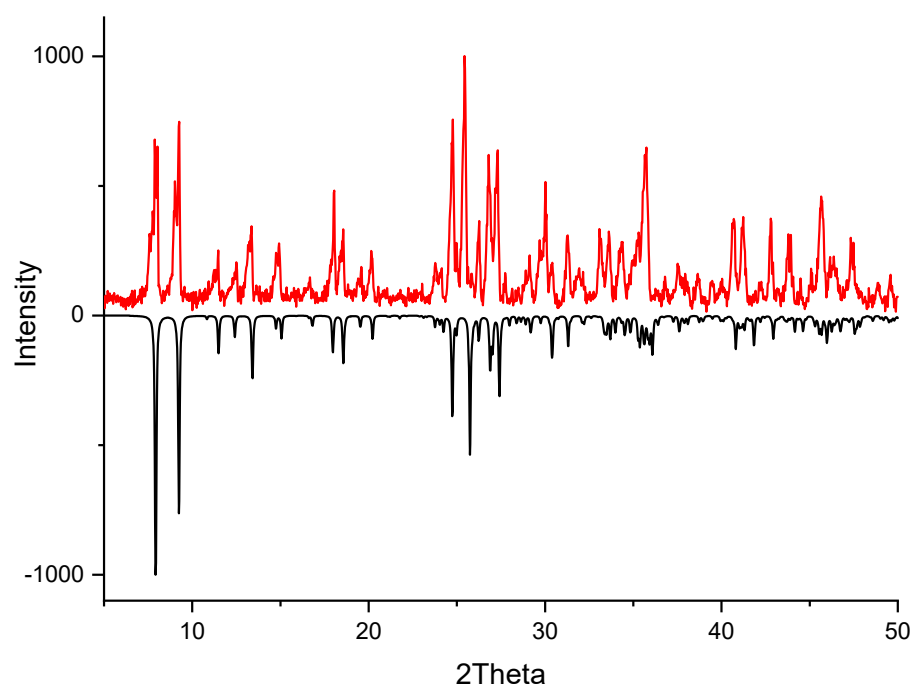

**Figure S4.** Powder XRD for the pure phase of **4** (*red*) shown in comparison with the pattern simulated from single crystal x-ray data for this compound (*black*).

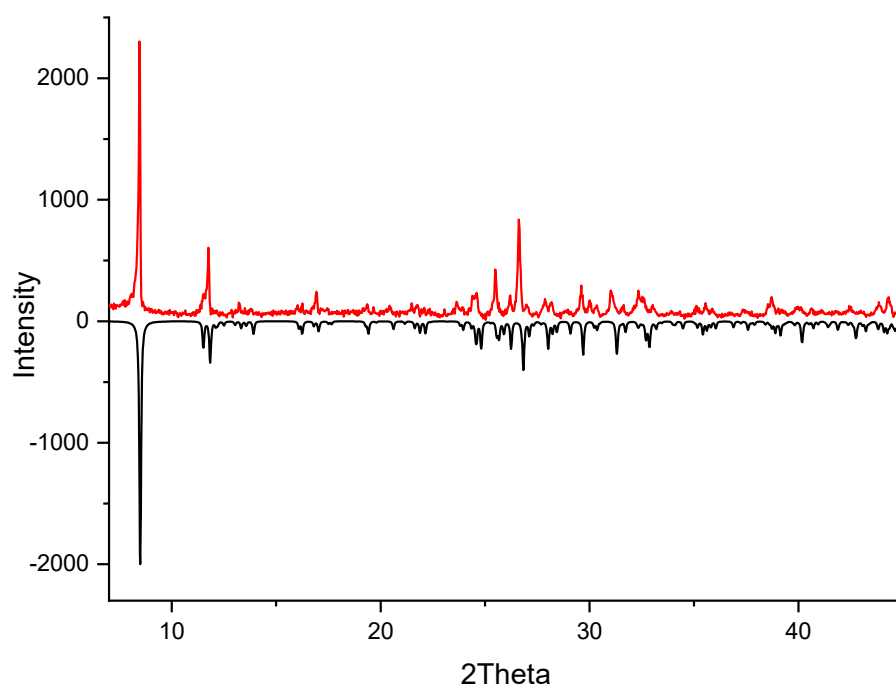

**Figure S5.** Powder XRD for the pure phase of **5** (*red*) shown in comparison with the pattern simulated from single crystal x-ray data for this compound (*black*).

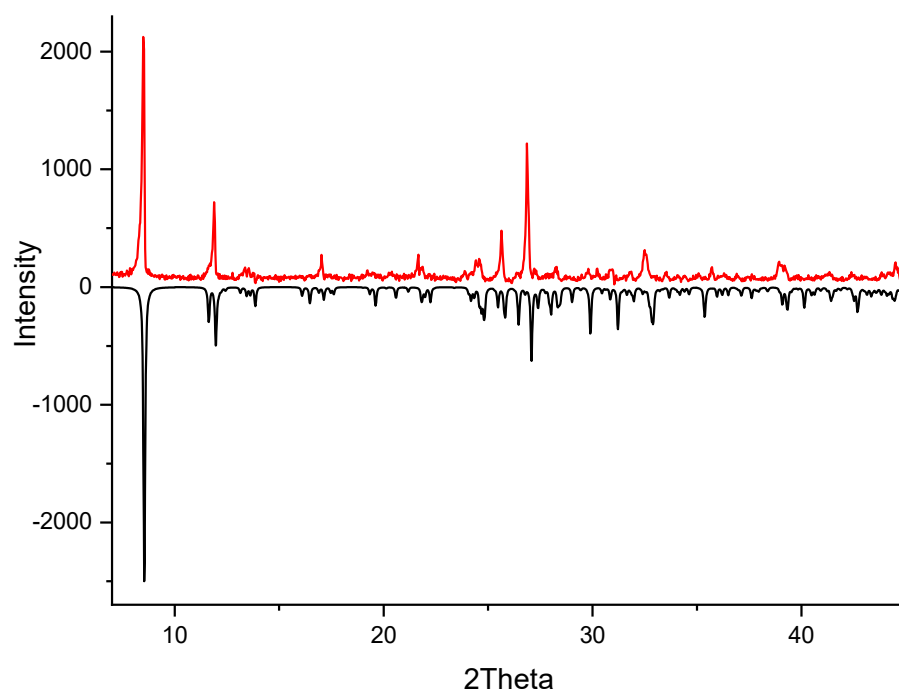

**Figure S6.** Powder XRD for the pure phase of **6** (*red*) shown in comparison with the pattern simulated from single crystal x-ray data for this compound (*black*).

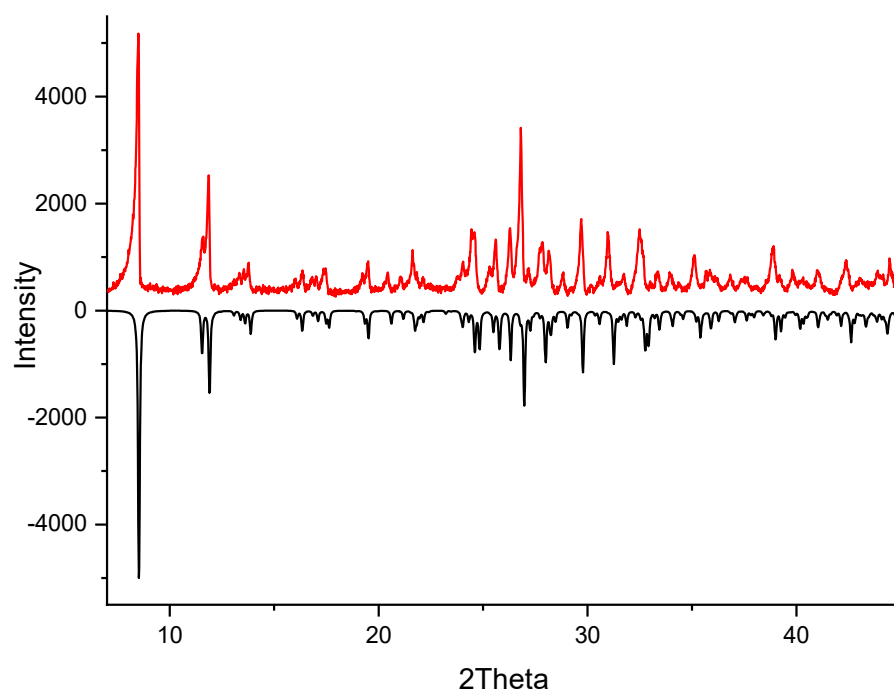

**Figure S7.** Powder XRD for the pure phase of **7** (*red*) shown in comparison with the pattern simulated from single crystal x-ray data for this compound (*black*).



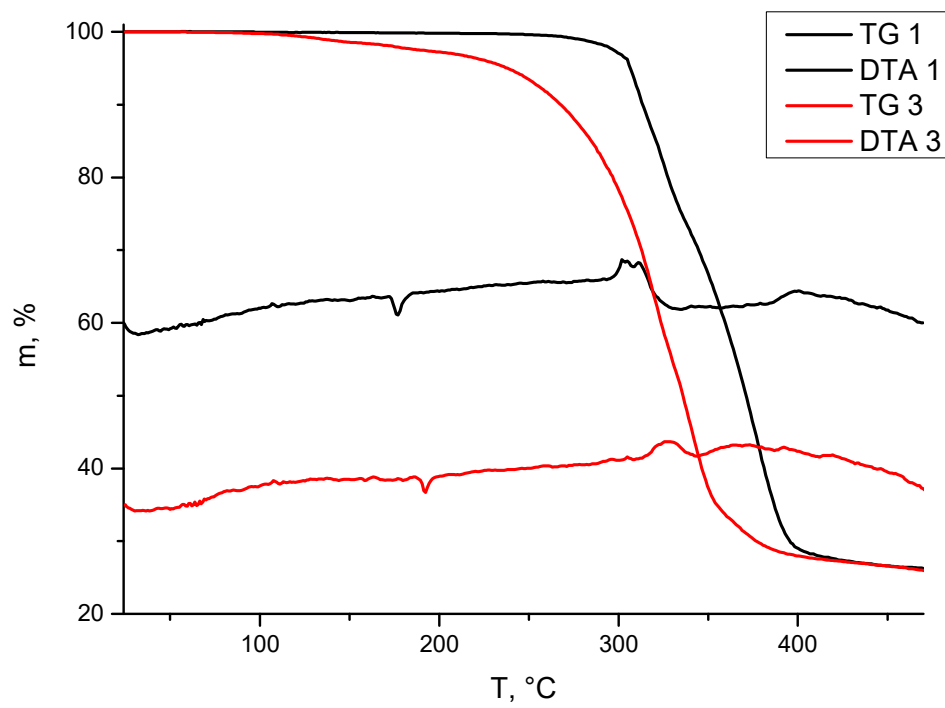

**Figure S8.** TG and DTA curves for **1** (*black*) and **3** (*red*).

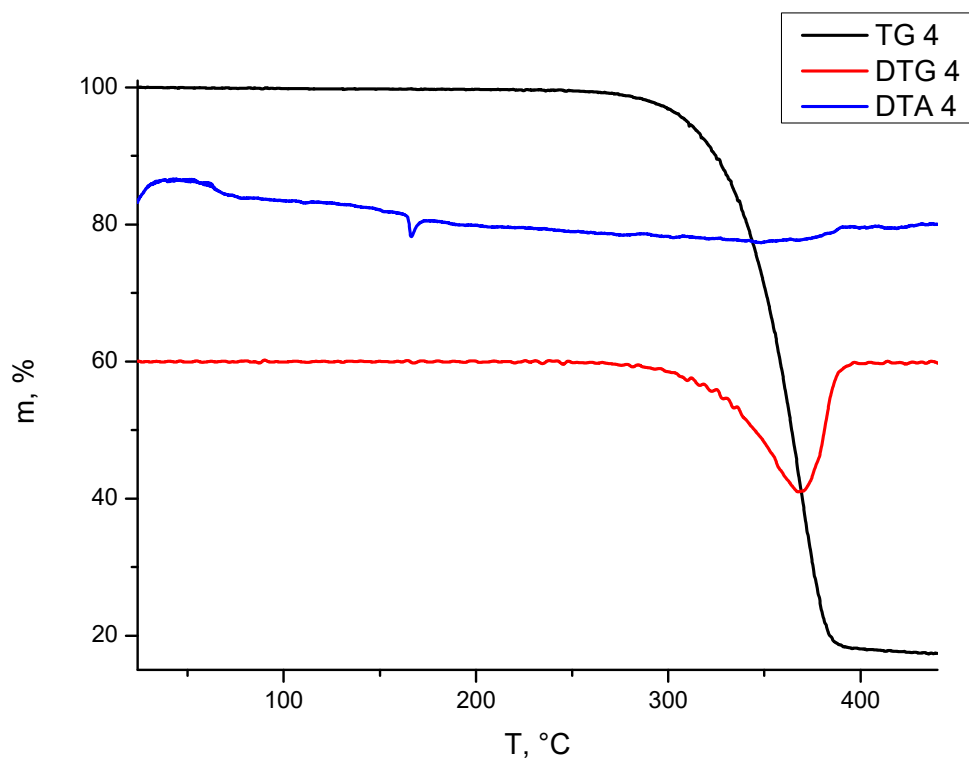

**Figure S9.** TG, DTG and DTA curves for 4.

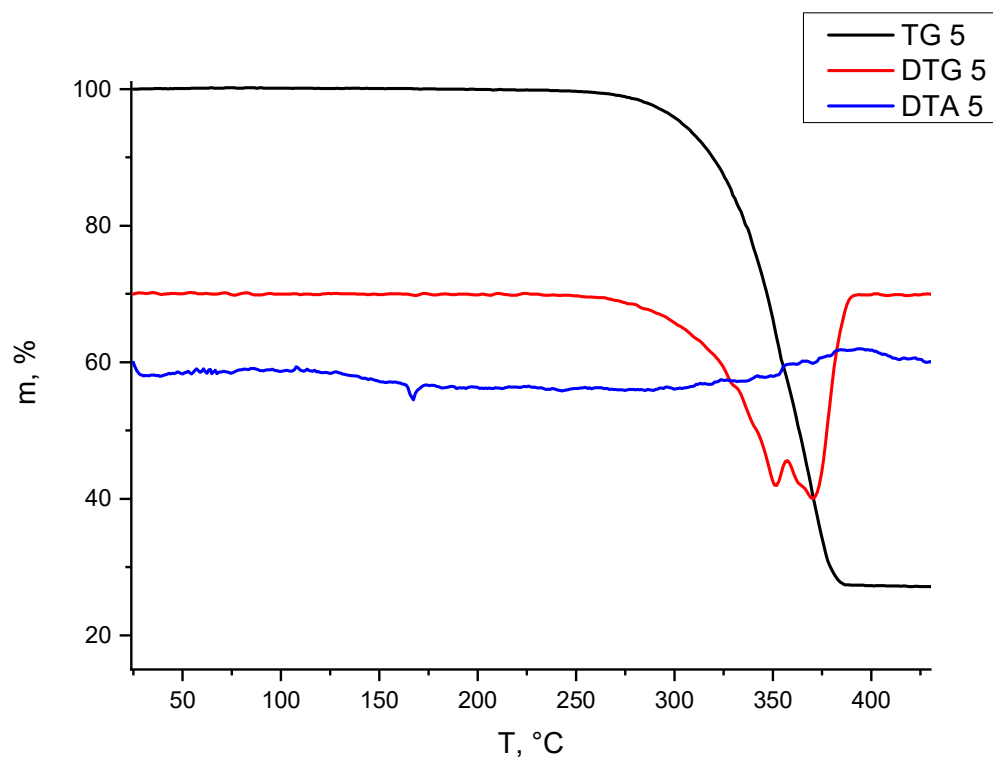

**Figure S10.** TG, DTG and DTA curves for **5**.

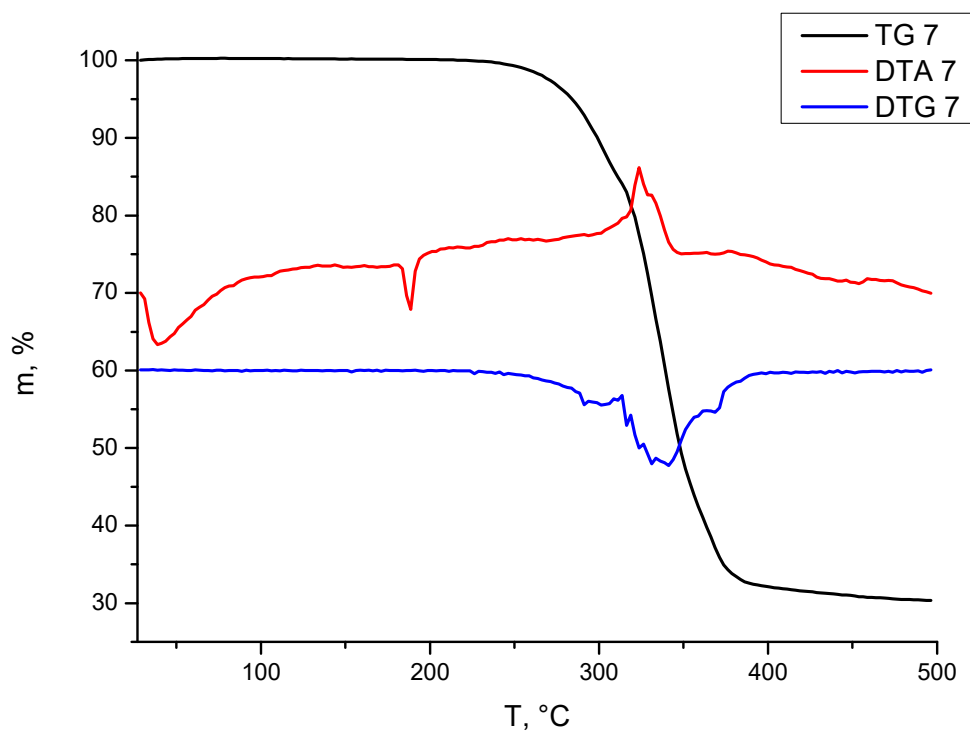

**Figure S11.** TG, DTG and DTA curves for 7.

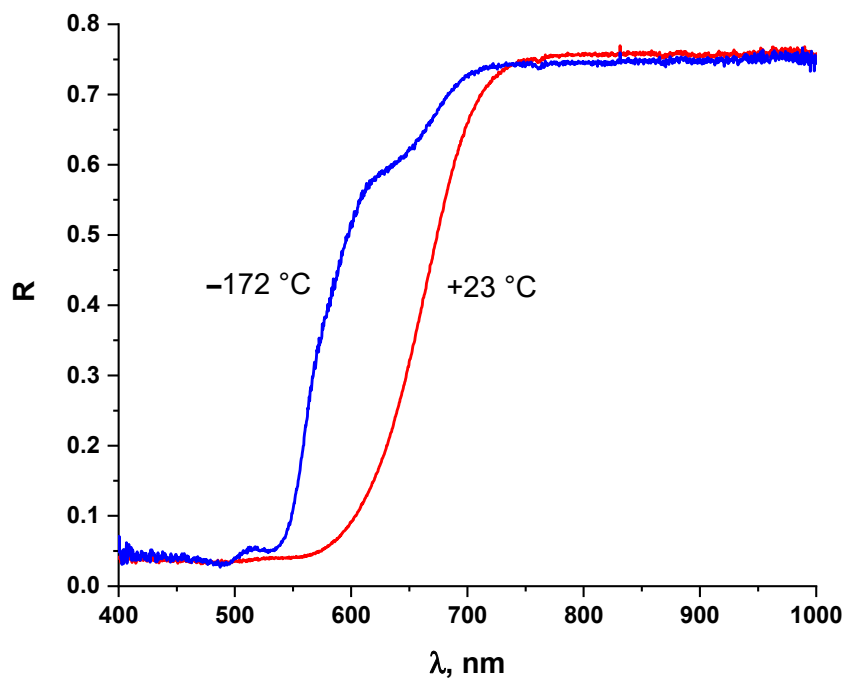

**Figure S12.** Diffuse reflectance spectra for 1.

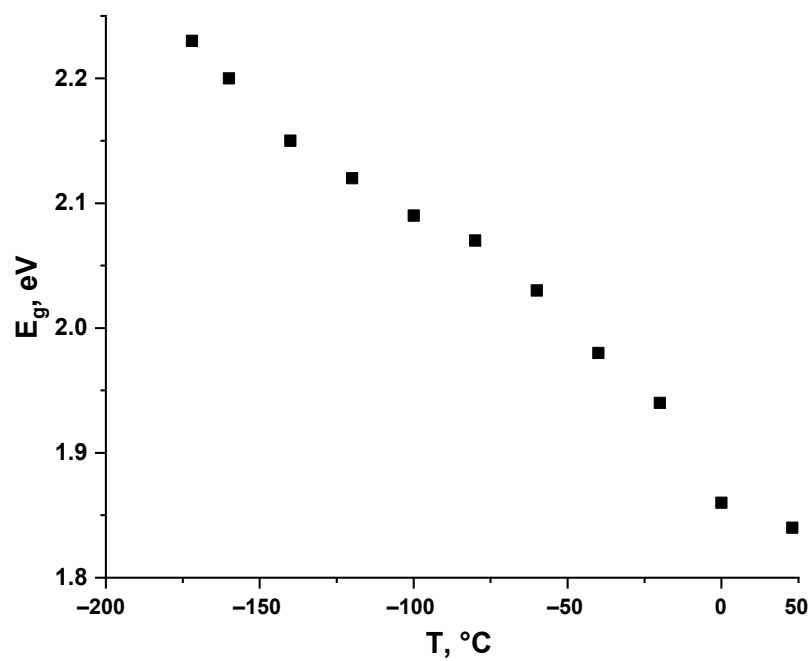

**Figure S13.** Temperature dependence of  $E_g$  for **1**.

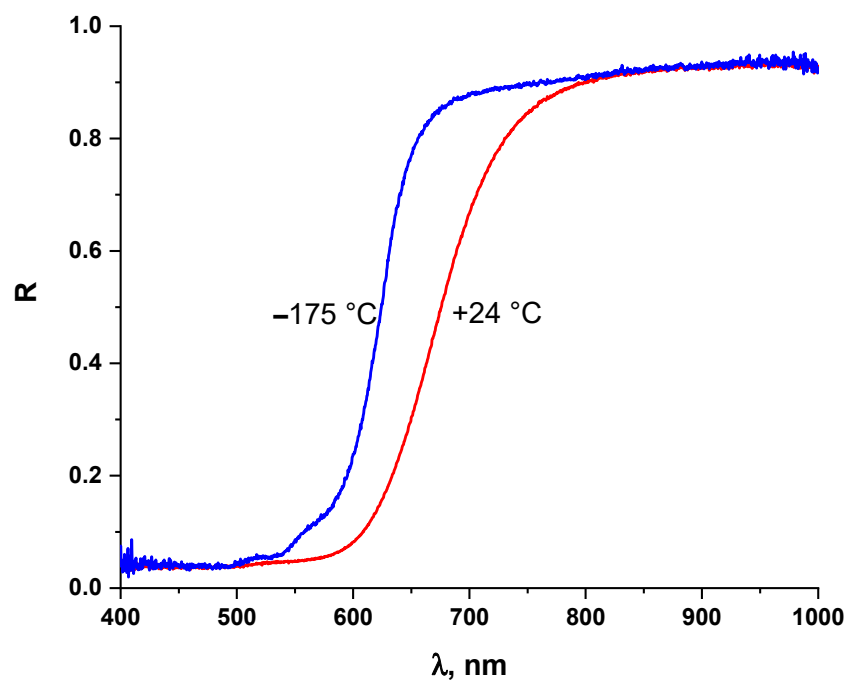

**Figure S14.** Diffuse reflectance spectra for **2**.

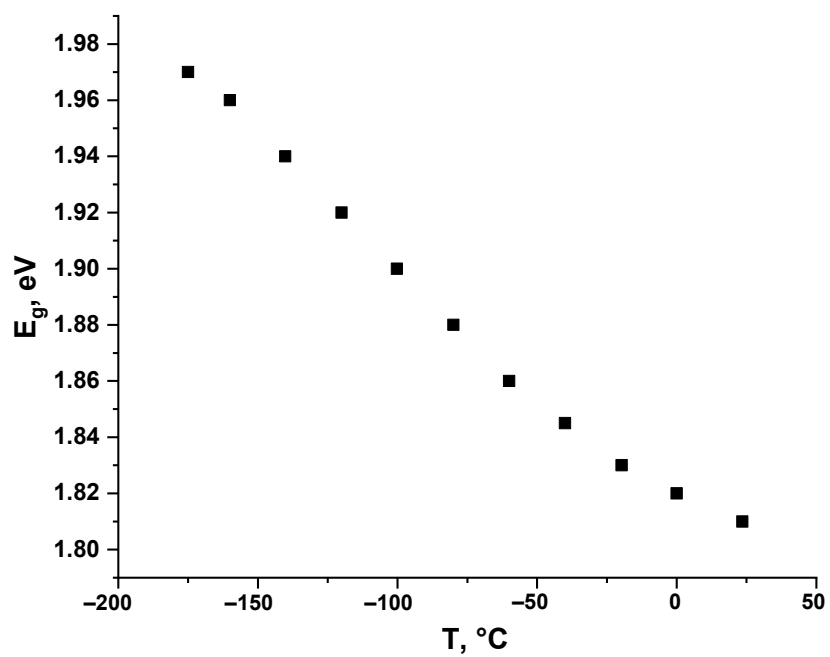

Figure S15. Temperature dependence of  $E_g$  for **2**.

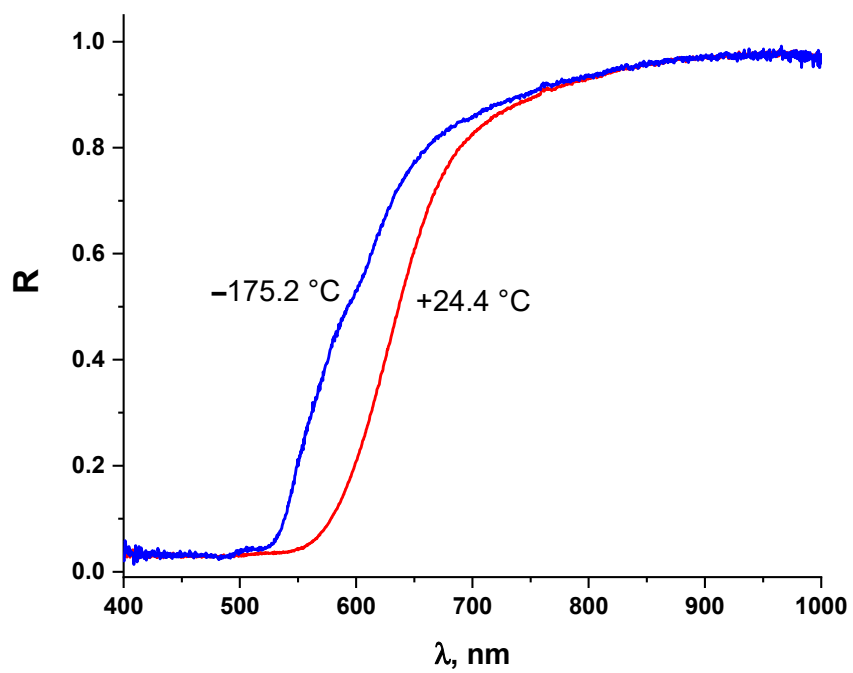

Figure S16. Diffuse reflectance spectra for **3**.

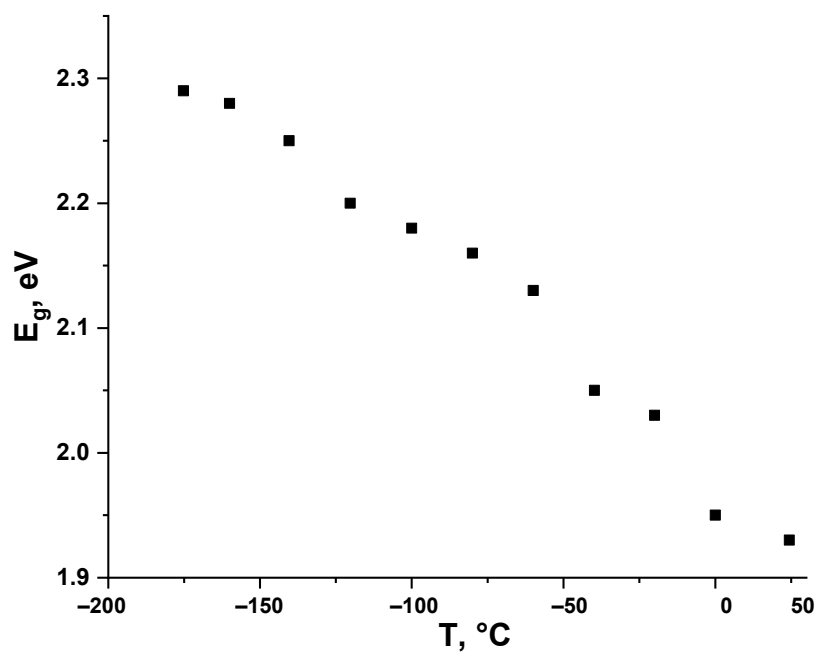

Figure S17. Temperature dependence of  $E_g$  for **3**.

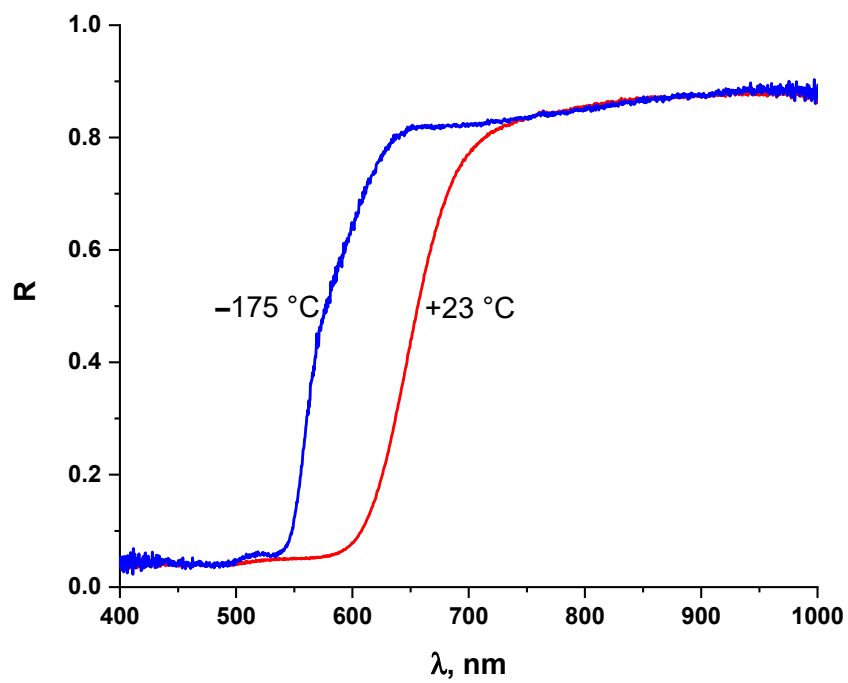

Figure S18. Diffuse reflectance spectra for **4**.

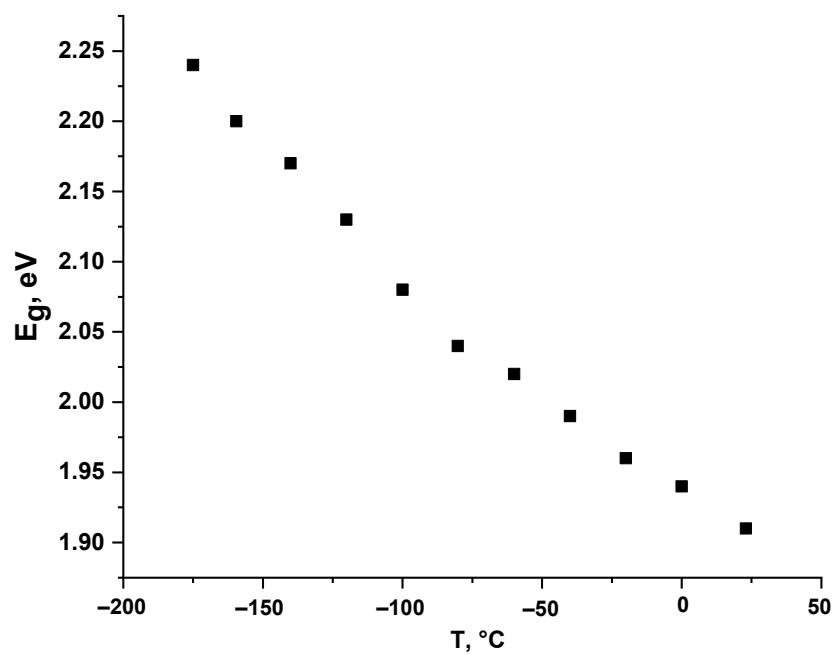

**Figure S19.** Temperature dependence of  $E_g$  for 4.

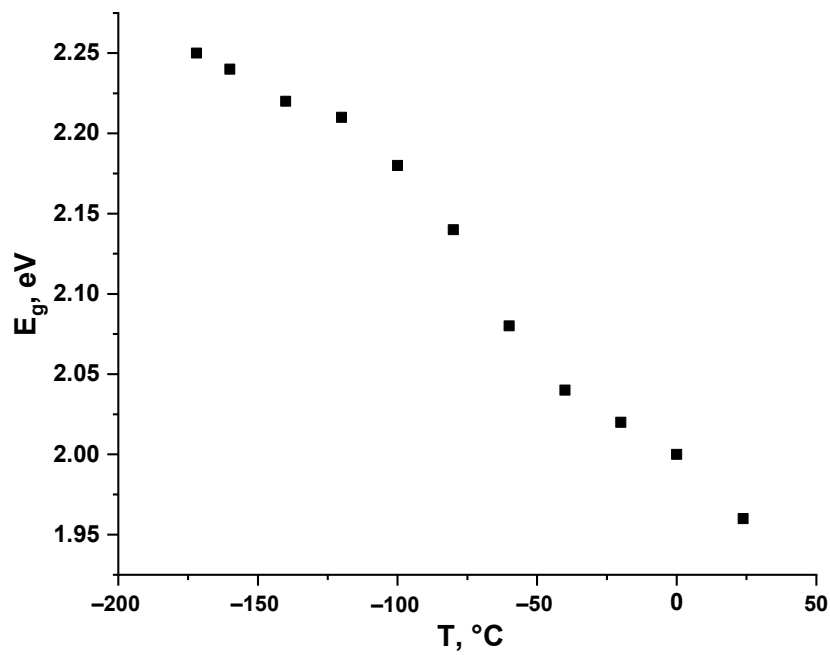

**Figure S20.** Temperature dependence of  $E_g$  for 5.



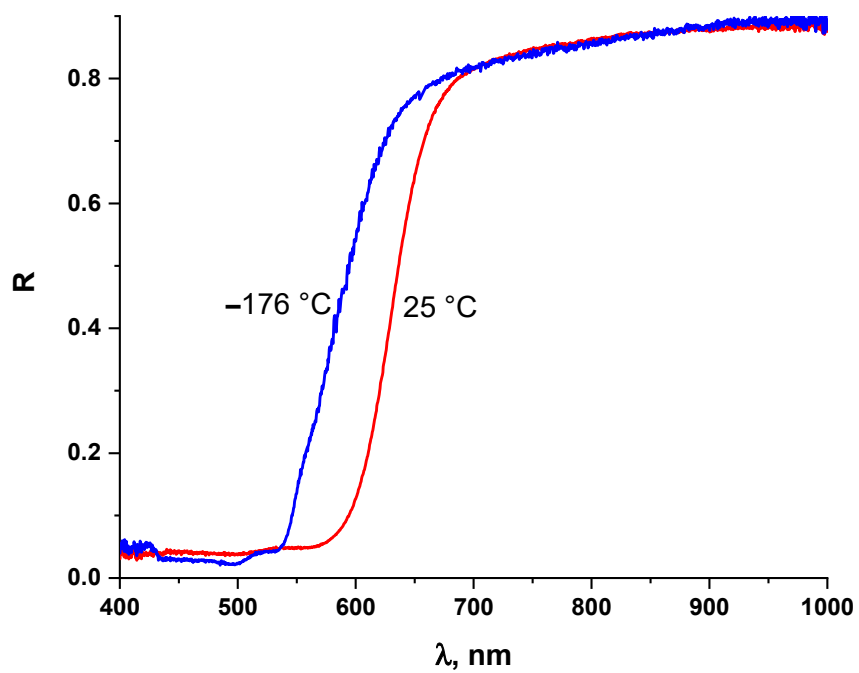

Figure S21. Diffuse reflectance spectra for **6**.

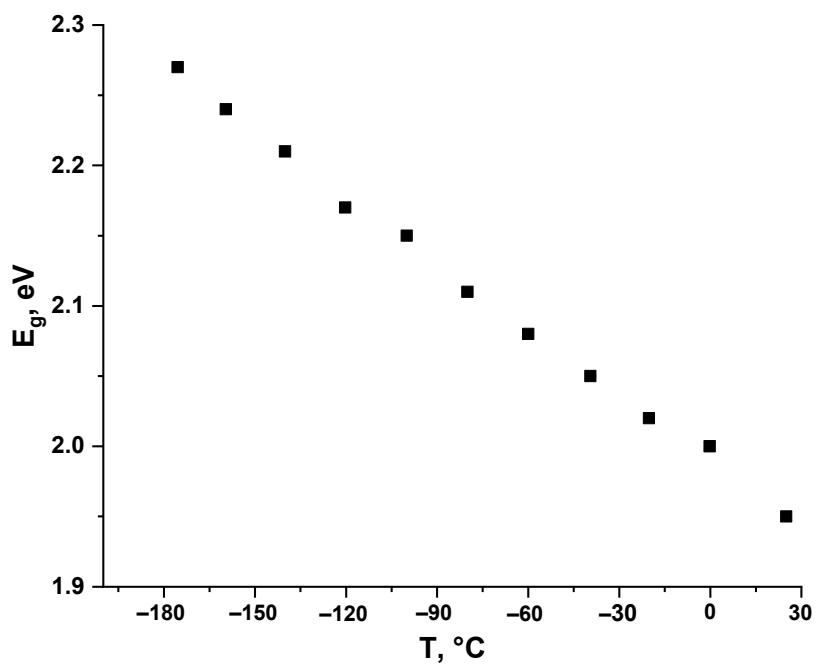

Figure S22. Temperature dependence of  $E_g$  for **6**.

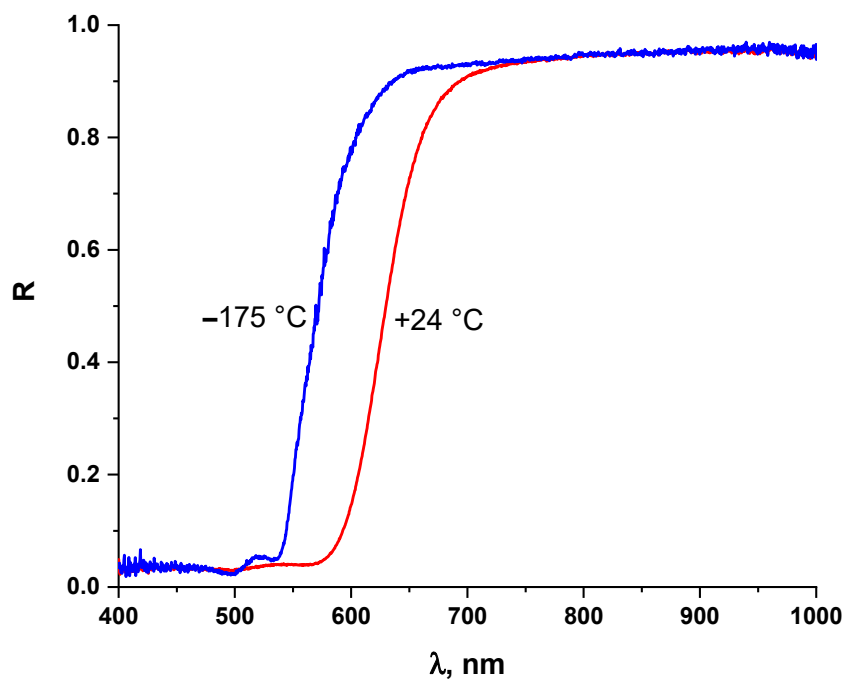

Figure S23. Diffuse reflectance spectra for 7.

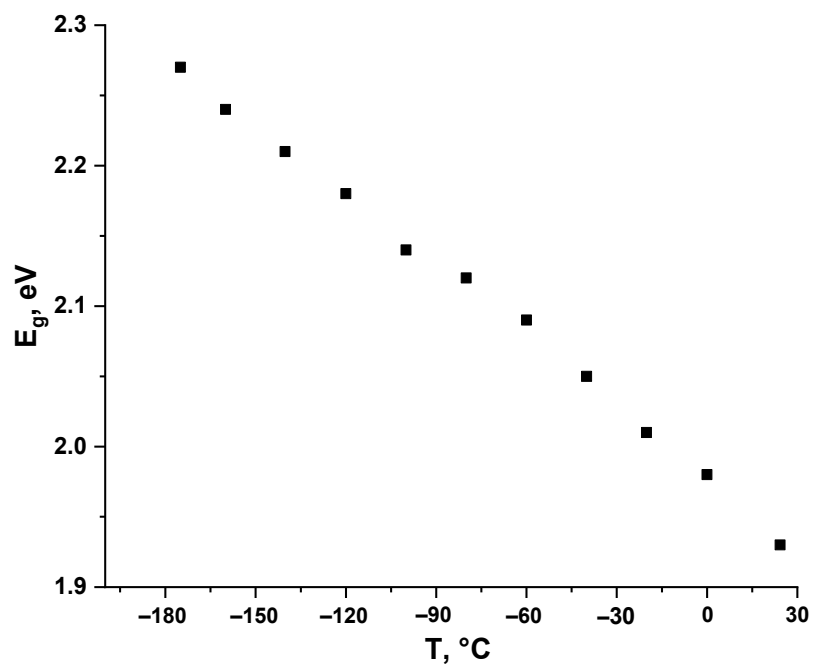

Figure S24. Temperature dependence of  $E_g$  for 7.

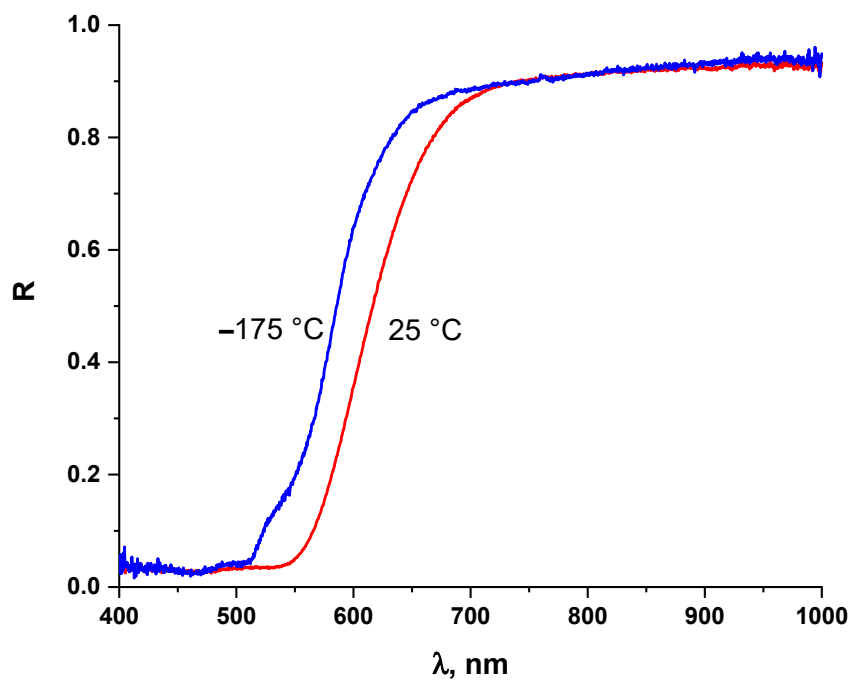

Figure S25. Diffuse reflectance spectra for **8**.

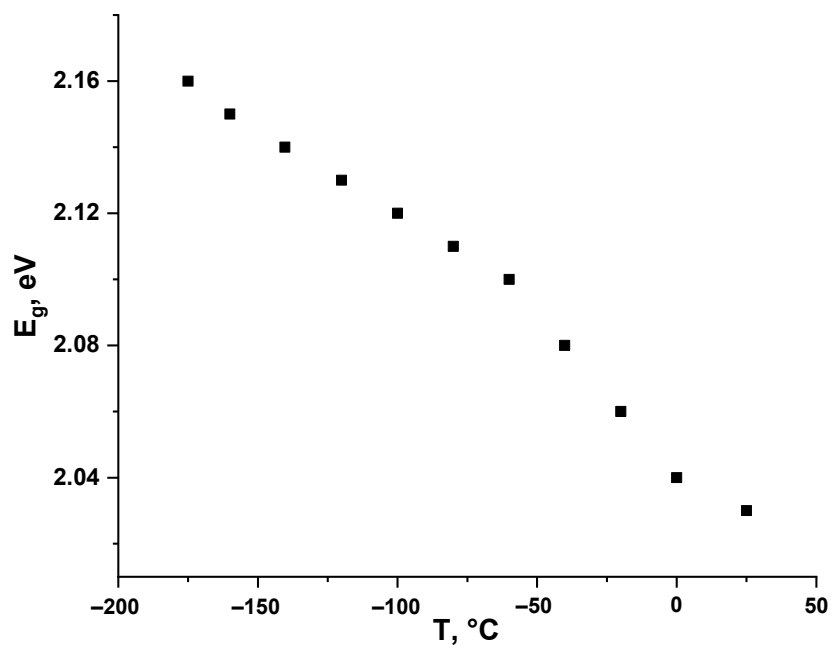

Figure S26. Temperature dependence of  $E_g$  for **8**.

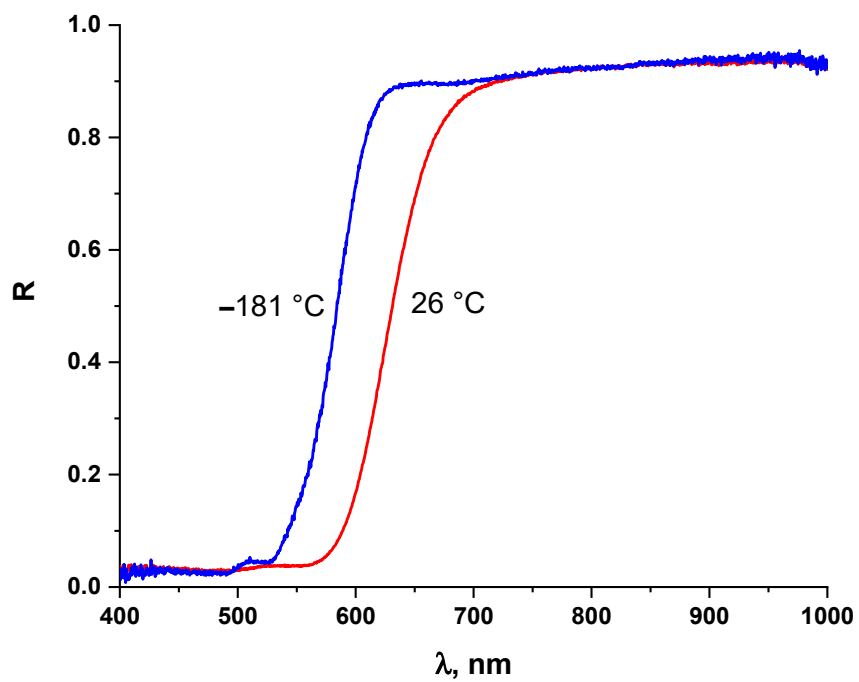

Figure S27. Diffuse reflectance spectra for **9**.

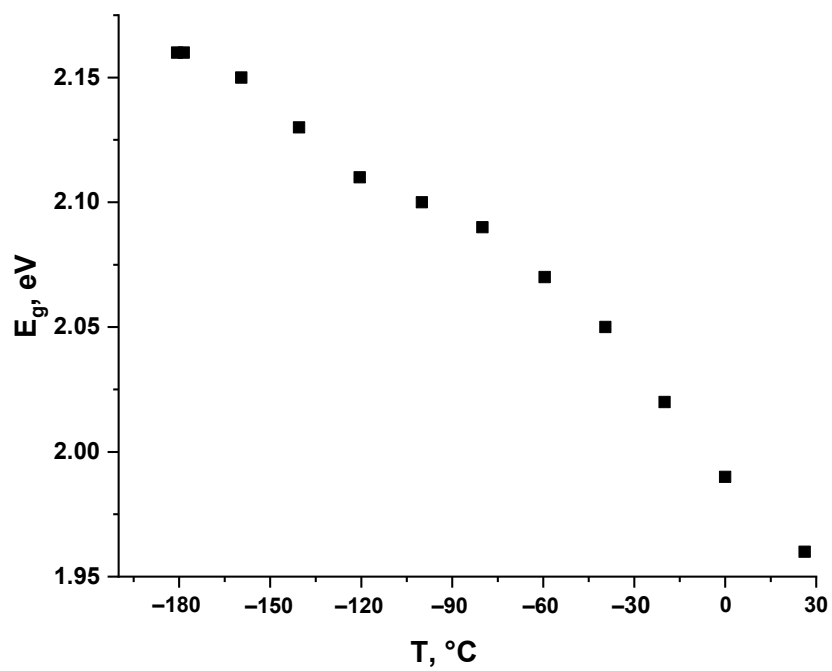

Figure S28. Temperature dependence of  $E_g$  for **9**.
